# Supplementary material
Source: Springer Nature journal article supplement (https://www.springermedizin.de/resource/supplementary/12884_2010_366_MOESM1_ESM.pdf/9457706)

Age Standardised Rate per 100 deliveries

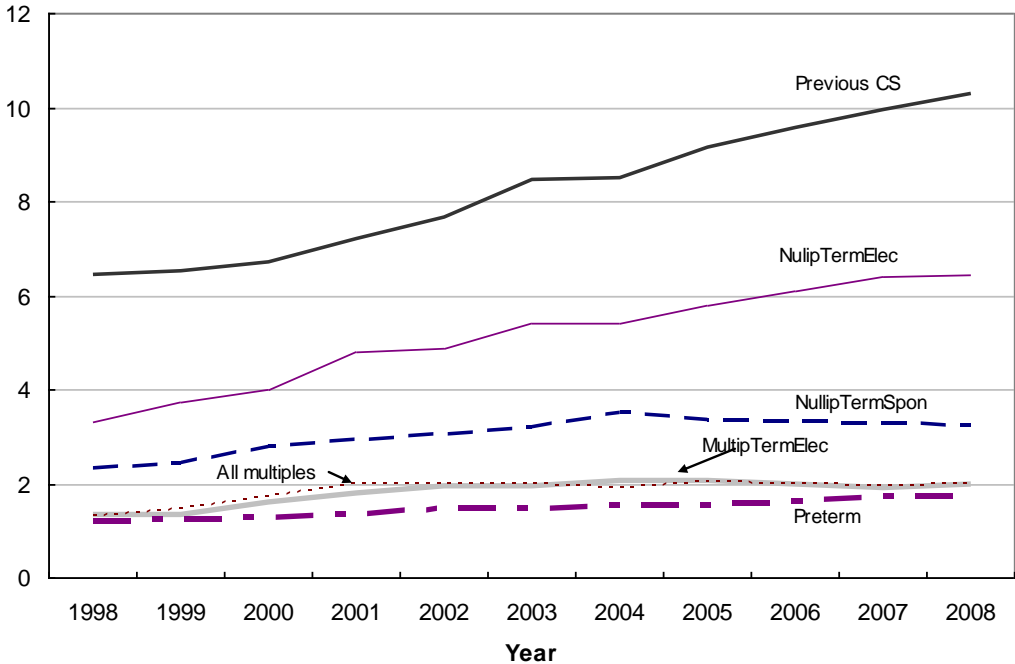

Supplement: MOESM1 [file 9457706]
